# Supplementary material
Source: Springer Nature journal article supplement (https://www.springermedizin.de/resource/supplementary/13046_2011_486_MOESM5_ESM.pdf/9662334)

28

Oxymatrine (mg/ml)

Control

0.5

1.0

2.0

Cytochrome C

Procaspase 3

Cleaved caspase 3

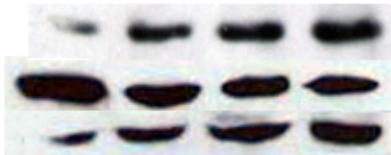

Supplement: MOESM5 [file 9662334]
